# Supplementary material
Source: publisher figshare collection journal article supplement (https://gsajournals.figshare.com/ndownloader/files/20183219)
Supplement: Supplementary file 1 [file 20183219]

## Sheet: Sheet1
ID Number	Number Sections	Average Neutrophils	Standard Error of the Mean	Standard Length (cm)	Sex
3003.01	10	7.9	20.0704	0.764924	F
3003.02	12	3.16667	0.0641778	0.78408	F
3003.03	13	5.69231	5.16338	0.783601	F
3003.04	9	5.11111	2.85986	0.808973	F
3003.06	15	4.2	0.6084	0.782203	F
3003.07	15	4	0.3364	0.781061	M
3003.09	14	1.92857	2.22436	0.800183	M
3003.1	14	3.78571	0.133747	0.829542	M
3003.12	10	5.5	4.3264	0.760372	M
3003.13	11	4.09091	0.450119	0.743712	M
3003.14	6	1.83333	2.51751	0.656254	M
3003.15	10	3	0.1764	0.746645	F
3003.16	13	1.15385	5.13545	0.770828	M
3003.17	15	3.8	0.1444	0.637767	M
3003.18	12	2.58333	0.700011	0.76221	M
3003.19	11	3.27273	0.0216893	0.799459	F
3003.2	6	3.16667	0.0641778	0.687575	F
3003.21	15	1.86667	2.41284	0.632923	F
3003.22	10	0.7	7.3984	0.708297	F
3003.23	11	2.72727	0.479871	0.705549	M
3003.24	9	1.33333	4.35418	0.650073	M
3003.25	11	4.36364	0.89045	0.813436	F
3003.28	12	2.66667	0.567511	0.777323	M
3003.29	9	5.88889	6.09541	0.795946	F
3003.31	11	3.63636	0.0468132	0.766021	F
3003.32	12	4.58333	1.35334	0.783537	F
3003.33	11	3.09091	0.108301	0.824634	F
3003.34	10	4.6	1.3924	0.770794	M
3003.36	12	2.58333	0.700011	0.819836	F
3003.37	13	3.84615	0.181607	0.784382	M
3003.38	15	1.86667	2.41284	0.833071	M
3003.39	15	3.26667	0.0235111	0.811253	F
3003.41	7	1.85714	2.44252	0.613907	F
3003.42	13	2.61538	0.647406	0.83776	M
3003.43	12	4.41667	0.993344	0.795739	M
3003.44	11	2.18182	1.53309	0.729497	F
3003.45	11	2.54545	0.76483	0.637404	F
3003.46	10	3.1	0.1024	0.763495	F
3003.47	9	2.22222	1.43467	0.791836	F
3003.48	13	1.30769	4.46184	0.662543	M
3003.5	11	6.81818	11.5476	0.847145	F
3003.51	8	4.375	0.912025	0.763387	M
3003.52	12	3.83333	0.170844	0.785314	F
3003.53	12	2.75	0.4489	0.812735	F
3003.54	12	3.83333	0.170844	0.713403	F
3003.55	12	3.5	0.0064	0.752052	M
3003.57	13	5.07692	2.74539	0.829332	F
3003.59	13	2.38462	1.07202	0.819285	F
3003.6	7	1	5.8564	0.667352	M
3003.63	8	3.125	0.087025	0.802262	F
3003.65	8	1.875	2.38702	0.775063	M
3003.66	10	4.9	2.1904	0.793225	F
3003.69	9	2.22222	1.43467	0.757765	M
3003.7	11	3.8	0.1444	0.76672	F
3003.72	12	3.08333	0.113344	0.810047	F
3003.76	9	5.11111	2.85986	0.859059	F
3003.78	9	3.11111	0.0954123	0.712418	M
3003.8	13	1.53846	3.54019	0.803104	F
3003.81	12	3	0.1764	0.833322	M
3003.82	10	5.2	3.1684	0.818096	F
3003.83	11	3.45455	0.00119339	0.778703	M
3003.84	13	3	0.1764	0.857477	F
3003.87	12	7.41667	15.9733	0.805456	M
3003.88	8	3.125	0.087025	0.776414	M
